# Supplementary material for: Effects of Dietary Vegetable Oils on Mammary Lipid-Related Genes in Holstein Dairy Cows
Source: PubMed Central journal article supplement (PMC7023335; doi:10.3390/ani10010057), 2019-12-27
Supplement: animals-10-00057-s001.pdf [file animals-10-00057-s001.pdf]

**Table S1.** qPCR performance of target genes and internal controls (*GAPDH*, *EIF3K* and *UXT*)

| Gene                | Median Ct <sup>1</sup> | Median $\Delta$ Ct <sup>2</sup> | Slope | (R <sup>2</sup> ) <sup>3</sup> | Efficiency <sup>4</sup> |
|---------------------|------------------------|---------------------------------|-------|--------------------------------|-------------------------|
| <i>ACACA</i>        | 27.35                  | 3.50                            | -3.32 | 0.997                          | 1.99                    |
| <i>ACSL1</i>        | 28.83                  | 4.98                            | -3.37 | 0.997                          | 1.97                    |
| <i>ACSS2</i>        | 22.75                  | -1.10                           | -3.1  | 0.937                          | 2.00                    |
| <i>DGAT1</i>        | 23.09                  | -0.77                           | -3.51 | 0.996                          | 1.92                    |
| <i>DGAT2</i>        | 21.78                  | -2.07                           | -3.47 | 0.995                          | 1.94                    |
| <i>FABP3</i>        | 29.05                  | 5.20                            | -3.38 | 0.994                          | 1.97                    |
| <i>FABP4</i>        | 29.22                  | 5.36                            | -3.29 | 0.961                          | 2.00                    |
| <i>FADS2</i>        | 27.00                  | 3.14                            | -3.51 | 0.999                          | 1.92                    |
| <i>FASN</i>         | 28.91                  | 5.06                            | -3.76 | 0.998                          | 1.84                    |
| <i>INSIG1</i>       | 30.14                  | 6.28                            | -3.32 | 0.987                          | 1.99                    |
| <i>LPIN1</i>        | 28.68                  | 4.82                            | -3.53 | 0.995                          | 1.91                    |
| <i>LPL</i>          | 27.09                  | 3.23                            | -3.38 | 0.995                          | 1.97                    |
| <i>PLIN2 (ADFP)</i> | 27.24                  | 3.39                            | -3.56 | 0.995                          | 1.90                    |
| <i>PPARG</i>        | 22.55                  | -1.31                           | -3.43 | 0.996                          | 1.95                    |
| <i>SCAP</i>         | 29.46                  | 5.60                            | -3.54 | 0.998                          | 1.91                    |
| <i>SCD</i>          | 28.27                  | 4.41                            | -3.62 | 0.997                          | 1.88                    |
| <i>SLC27A6</i>      | 25.12                  | 1.26                            | -3.42 | 0.996                          | 1.96                    |
| <i>SREBF1</i>       | 22.96                  | -0.89                           | -3.32 | 0.996                          | 1.99                    |
| <i>THRSP</i>        | 20.06                  | -3.80                           | -3.44 | 0.995                          | 1.95                    |
| <i>VLDLR</i>        | 22.36                  | -1.50                           | -3.38 | 0.995                          | 1.97                    |
| <i>GAPDH</i>        | 21.09                  | -                               | -3.63 | 0.998                          | 1.88                    |
| <i>EIF3K</i>        | 24.12                  | -                               | -3.4  | 0.994                          | 1.96                    |
| <i>UXT</i>          | 26.36                  | -                               | -3.4  | 0.995                          | 1.96                    |

<sup>1</sup>The median is calculated considering all samples.

<sup>2</sup>The median of  $\Delta$ Ct is calculated as [Ct gene – geometric mean of Ct internal controls] for each sample.

<sup>3</sup>R<sup>2</sup> represents the coefficient of determination of the standard curve.

<sup>4</sup>Efficiency was calculated as  $[10^{(-1 / \text{Slope})}]$ .

**Table S2.** Relative expression of genes involved in lipid metabolism in milk somatic cells from cows fed control (no fat supplementation) on days 42 and 63 using the relative abundance of day 21 as a reference condition

| Gene                | Day | Relative abundance | Standard error | P-value | Regulation |
|---------------------|-----|--------------------|----------------|---------|------------|
| <i>ACACA</i>        | 42  | 0.329              | 0.020 - 4.69   | 0.274   |            |
|                     | 63  | 2.485              | 0.396 - 11.4   | 0.101   |            |
| <i>FADS2</i>        | 42  | 0.167              | 0.072 - 0.389  | <0.001  | DOWN       |
|                     | 63  | 3.916              | 0.180 - 137.8  | 0.189   |            |
| <i>FASN</i>         | 42  | 1.392              | 0.058 - 44.7   | 0.772   |            |
|                     | 63  | 11.268             | 0.888 - 155.4  | <0.001  | UP         |
| <i>SCD</i>          | 42  | 0.171              | 0.024 - 1.96   | <0.001  | DOWN       |
|                     | 63  | 2.152              | 0.199 - 24.5   | 0.252   |            |
| <i>ADFP (PLIN2)</i> | 42  | 0.716              | 0.141 - 5.91   | 0.642   |            |
|                     | 63  | 2.251              | 0.307 - 10.7   | 0.117   |            |
| <i>INSIG1</i>       | 42  | 2.361              | 0.421 - 7.38   | 0.084   |            |
|                     | 63  | 15.834             | 2.18 - 546.3   | <0.001  | UP         |
| <i>SCAP</i>         | 42  | 0.046              | 0.016 - 0.109  | <0.001  | DOWN       |
|                     | 63  | 0.469              | 0.114 - 2.67   | 0.128   |            |
| <i>SREBF1</i>       | 42  | 1.815              | 0.152 - 12.8   | 0.363   |            |
|                     | 63  | 10.979             | 1.79 - 108.3   | <0.001  | UP         |
| <i>THRSP</i>        | 42  | 0.541              | 0.219 - 1.32   | 0.054   |            |
|                     | 63  | 8.051              | 0.417 - 1.00   | 0.158   |            |
| <i>PPARG</i>        | 42  | 0.17               | 0.026 - 0.902  | <0.001  | DOWN       |
|                     | 63  | 2.744              | 1.09 - 7.92    | <0.001  | UP         |
| <i>DGAT1</i>        | 42  | 0.562              | 0.037 - 12.3   | 0.583   |            |
|                     | 63  | 9.123              | 1.07 - 62.9    | <0.001  | UP         |
| <i>DGAT2</i>        | 42  | 1.917              | 0.266 - 8.45   | 0.247   |            |
|                     | 63  | 8.284              | 0.631 - 75.0   | <0.001  | UP         |
| <i>LPIN1</i>        | 42  | 2.313              | 0.098 - 54.7   | 0.432   |            |
|                     | 63  | 19.127             | 2.72 - 117.0   | <0.001  | UP         |
| <i>LPL</i>          | 42  | 5.565              | 0.924 - 33.1   | <0.001  | UP         |
|                     | 63  | 5.048              | 0.789 - 17.6   | <0.001  | UP         |
| <i>FATP</i>         | 42  | 1.946              | 0.213 - 14.5   | 0.340   |            |
|                     | 63  | 7.856              | 1.32 - 40.5    | <0.001  | UP         |
| <i>VLDLR</i>        | 42  | 2.194              | 0.779 - 7.78   | <0.001  | DOWN       |
|                     | 63  | 4.497              | 1.26 - 14.8    | <0.001  | UP         |
| <i>ACSL1</i>        | 42  | 9.677              | 2.61 - 30.2    | <0.001  | UP         |
|                     | 63  | 2.914              | 1.03 - 14.2    | <0.001  | UP         |
| <i>ACSS2</i>        | 42  | 8.539              | 3.36 - 28.8    | <0.001  | UP         |
|                     | 63  | 2.46               | 0.620 - 9.34   | <0.001  | DOWN       |
| <i>FABP3</i>        | 42  | 1.512              | 0.605 - 4.43   | 0.185   |            |
|                     | 63  | 1.057              | 0.517 - 2.06   | 0.766   |            |
| <i>FABP4</i>        | 42  | 0.552              | 0.085 - 4.59   | 0.358   |            |
|                     | 63  | 1.487              | 0.276 - 4.81   | 0.431   |            |

**Table S3.** Relative abundance of genes involved in lipid metabolism in milk somatic cells from cows fed with olive oil (OO) on days 42 and 63 using the relative abundance of day 21 as a reference condition

| Gene                | Day | Abundance | Standard Error    | P-Value | Regulation |
|---------------------|-----|-----------|-------------------|---------|------------|
| <i>ACACA</i>        | 42  | 19.803    | 0.478 - 4.912.875 | 0.037   | UP         |
|                     | 63  | 2.286     | 0.356 - 18.930    | 0.239   |            |
| <i>FADS2</i>        | 42  | 1.496     | 0.194 - 16.142    | 0.544   |            |
|                     | 63  | 0.824     | 0.060 - 38.501    | 0.843   |            |
| <i>FASN</i>         | 42  | 1.994     | 0.168 - 74.288    | 0.445   | DOWN       |
|                     | 63  | 0.041     | 0.002 - 0.515     | 0.001   |            |
| <i>SCD</i>          | 42  | 0.881     | 0.367 - 2.172     | 0.652   |            |
|                     | 63  | 2.337     | 0.369 - 21.641    | 0.204   |            |
| <i>ADFP (PLIN2)</i> | 42  | 2.326     | 1.296 - 4.679     | 0.001   | UP         |
|                     | 63  | 0.579     | 0.168 - 1.900     | 0.16    |            |
| <i>INSIG1</i>       | 42  | 1.148     | 0.072 - 17.507    | 0.88    |            |
|                     | 63  | 0.959     | 0.039 - 25.668    | 0.962   |            |
| <i>SCAP</i>         | 42  | 1.13      | 0.164 - 6.585     | 0.844   |            |
|                     | 63  | 0.322     | 0.028 - 2.949     | 0.155   |            |
| <i>SREBF1</i>       | 42  | 0.593     | 0.098 - 9.093     | 0.489   | DOWN       |
|                     | 63  | 0.136     | 0.025 - 0.992     | 0.003   |            |
| <i>THRSP</i>        | 42  | 0.915     | 0.245 - 3.531     | 0.875   | DOWN       |
|                     | 63  | 0.186     | 0.043 - 1.169     | 0.015   |            |
| <i>PPARG</i>        | 42  | 1.409     | 0.149 - 8.976     | 0.615   |            |
|                     | 63  | 0.35      | 0.048 - 2.145     | 0.098   |            |
| <i>DGAT1</i>        | 42  | 7.379     | 2.437 - 23.592    | <0.001  | UP         |
|                     | 63  | 0.168     | 0.022 - 1.072     | 0.01    | DOWN       |
| <i>DGAT2</i>        | 42  | 1.455     | 0.306 - 14.246    | 0.54    | DOWN       |
|                     | 63  | 0.147     | 0.017 - 0.806     | 0.003   |            |
| <i>LPIN1</i>        | 42  | 2.442     | 0.469 - 14.763    | 0.117   |            |
|                     | 63  | 0.537     | 0.122 - 2.350     | 0.233   |            |
| <i>LPL</i>          | 42  | 2.429     | 0.883 - 7.908     | 0.011   | UP         |
|                     | 63  | 0.458     | 0.168 - 1.516     | 0.048   | DOWN       |
| <i>FATP</i>         | 42  | 2.455     | 0.569 - 9.738     | 0.068   |            |
|                     | 63  | 1.187     | 0.559 - 3.334     | 0.569   |            |
| <i>VLDLR</i>        | 42  | 0.246     | 0.063 - 1.089     | 0.008   | DOWN       |
|                     | 63  | 0.528     | 0.167 - 1.514     | 0.09    |            |
| <i>ACSL1</i>        | 42  | 28.495    | 4.217 - 180.201   | <0.001  | UP         |
|                     | 63  | 0.705     | 0.140 - 2.961     | 0.54    |            |
| <i>ACSS2</i>        | 42  | 2.636     | 0.734 - 16.940    | 0.1     | DOWN       |
|                     | 63  | 0.268     | 0.044 - 2.152     | 0.036   |            |
| <i>FABP3</i>        | 42  | 1.512     | 0.260 - 5.239     | 0.519   |            |
|                     | 63  | 0.489     | 0.089 - 1.677     | 0.197   |            |
| <i>FABP4</i>        | 42  | 1.181     | 0.390 - 3.941     | 0.672   |            |
|                     | 63  | 2.206     | 0.293 - 13.372    | 0.175   |            |

**Table S4.** Relative abundance of genes involved in lipid metabolism in milk somatic cells from cows fed with hydrogenated vegetable oil (HVO) on days 42 and 63 using the relative abundance of day 21 as a reference condition

| Gene                | Day | Abundance | Standard error    | P- Value | Regulation |
|---------------------|-----|-----------|-------------------|----------|------------|
| <i>ACACA</i>        | 42  | 2.955     | 0.361 - 26.228    | 0.135    |            |
|                     | 63  | 6.719     | 1.797 - 47.276    | 0.023    | UP         |
| <i>FADS2</i>        | 42  | 0.256     | 0.043 - 1.896     | 0.044    | DOWN       |
|                     | 63  | 0.172     | 0.015 - 3.036     | 0.071    |            |
| <i>FASN</i>         | 42  | 3.652     | 0.233 - 58.763    | 0.118    |            |
|                     | 63  | 43.966    | 2.382 - 1.384.567 | <0.001   | UP         |
| <i>SCD</i>          | 42  | 0.67      | 0.320 - 1.853     | 0.253    |            |
|                     | 63  | 3.091     | 0.569 - 14.437    | 0.062    |            |
| <i>ADFP (PLIN2)</i> | 42  | 1.228     | 0.282 - 5.536     | 0.607    |            |
|                     | 63  | 4.811     | 1.849 - 12.244    | <0.001   | UP         |
| <i>INSIG1</i>       | 42  | 1.103     | 0.196 - 3.505     | 0.83     |            |
|                     | 63  | 0.935     | 0.159 - 2.972     | 0.876    |            |
| <i>SCAP</i>         | 42  | 0.305     | 0.057 - 2.118     | 0.055    |            |
|                     | 63  | 1.473     | 0.129 - 17.374    | 0.569    |            |
| <i>SREBF1</i>       | 42  | 0.371     | 0.091 - 2.319     | 0.123    |            |
|                     | 63  | 7.777     | 0.614 - 140.607   | 0.017    | UP         |
| <i>THRSP</i>        | 42  | 2.543     | 0.225 - 131.930   | 0.365    |            |
|                     | 63  | 0.259     | 0.012 - 4.184     | 0.158    |            |
| <i>PPARG</i>        | 42  | 0.076     | 0.017 - 0.288     | <0.001   | DOWN       |
|                     | 63  | 1.206     | 0.167 - 7.902     | 0.755    |            |
| <i>DGAT1</i>        | 42  | 2.821     | 0.303 - 13.662    | 0.106    |            |
|                     | 63  | 13.996    | 1.617 - 55.742    | <0.001   | UP         |
| <i>DGAT2</i>        | 42  | 1.117     | 0.190 - 12.477    | 0.882    |            |
|                     | 63  | 20.255    | 3.898 - 69.142    | <0.001   | UP         |
| <i>LPIN1</i>        | 42  | 0.216     | 0.086 - 0.463     | 0.001    | DOWN       |
|                     | 63  | 2.338     | 0.837 - 7.286     | 0.028    | UP         |
| <i>LPL</i>          | 42  | 1.118     | 0.519 - 2.527     | 0.718    |            |
|                     | 63  | 3.974     | 1.917 - 12.158    | <0.001   | UP         |
| <i>FATP</i>         | 42  | 3.259     | 1.358 - 7.567     | 0        | UP         |
|                     | 63  | 3.183     | 1.029 - 14.975    | 0.018    | UP         |
| <i>VLDLR</i>        | 42  | 0.804     | 0.474 - 1.347     | 0.244    |            |
|                     | 63  | 1.872     | 1.029 - 3.219     | 0.011    | UP         |
| <i>ACSL1</i>        | 42  | 11.963    | 1.774 - 223.026   | 0        | UP         |
|                     | 63  | 5.809     | 0.947 - 108.280   | 0.023    | UP         |
| <i>ACSS2</i>        | 42  | 1.901     | 0.904 - 4.131     | 0.035    | UP         |
|                     | 63  | 3.824     | 0.622 - 11.613    | 0.011    | UP         |
| <i>FABP3</i>        | 42  | 2.512     | 0.656 - 8.561     | 0.075    |            |
|                     | 63  | 1.42      | 0.247 - 7.227     | 0.513    |            |
| <i>FABP4</i>        | 42  | 2.099     | 0.317 - 21.543    | 0.242    |            |
|                     | 63  | 0.635     | 0.245 - 2.848     | 0.331    |            |
